# Supplementary material for: The impact on life cycle carbon footprint of converting from disposable to reusable sharps containers in a large US hospital geographically distant from manufacturing and processing facilities
Source: PeerJ. 2019 Feb 22;7:e6204. doi: 10.7717/peerj.6204 (PMC6388662; doi:10.7717/peerj.6204)
Supplement: Supplemental Information 1 [file peerj-07-6204-s001.xlsx]

## Sheet: Raw Data
		Annex: Life Cycle inventory, Flows, Units, Characterization Factors and MTCO2e
		Life Cycle inventory - Unit Processes	Flow	Unit	CO2eq Conversion Factor	Conversion units	MTCO2e	Data Source	Representativeness of data collected (Uncertainty Analysis)
		Container Manufacture
		Number DSC manufactured in study year	48460	container	(for calculations below)			LLUH (No.)	High (primary)
		Number RSC manufactured in study year	2782	container	(for calculations below)			Daniels (No.)	High (primary)
		Number RSC uses in study year	33356	container	(for calculations below)			Daniels (No.)	High (primary)
		Lifespan RSC	41.7	Years	(for calculations below)			Daniels (No.)	High (primary)
		polypropylene manufactured for DSC Study year	50.635	tonnes	1868	kgCO2e/tonne	94586.2	Daniels (wgt); ACC (CF)	High to Medium (Industry)
		ABS polymer manufactured for RSC study Year	9.5492	tonnes	3749	kgCO2e/tonne	858.512	Daniels (wgt); ACC (CF)	High to Medium (Industry)
		polypropylene manufactured for RSC Study year	0.4305	tonnes	1868	kgCO2e/tonne	804.174	LLUH (No.); Daniels (wgt); ACC (CF)	High to Medium (Industry)
		Energy rate for DSC manufacture	1860	kWh/tonne	(for calculations below)			Clarion (Energy)	High (primary)
		Energy rate for RSC manufacture	2081	kWh/tonne	(for calculations below)			Clarion (Energy)	High (primary)
		GHG of electricity for DSC manufacture (Illinois)	94181.1	kWh	0.63	kgCO2e/kWh	59334.1	USEPA eGrid (Energy CF)	Medium (regional value)
		GHG of electricity for RSC manufacture (Michigan) lifespan 41.7 yrs)	19871.9	kWh	0.717	kgCO2e/kWh	14248.1	USEPA eGrid (Energy CF)	Medium (regional value)
		GHG of electricity for manufacture of 412 DSC in RSC year (Illinois)	800.73	kWh	0.63	kgCO2e/kWh	504.46	USEPA eGrid (Energy CF)	Medium (regional value)
		Transport
		Transport Vehicles and Utilization
		T1: Artic 3.5-33t: 100 % utilization	(calcs below)	tonne.km	0.104	kgCO2e/t.km	(calcs below)	DEFRA 2015 (t.km CF)	Medium (secondary)
		T2: Shipping	(calcs below)	tonne.km	0.019	kgCO2e/t.km	(calcs below)	DEFRA 2015 (t.km CF)	Medium (secondary)
		T3: Rail Freight	(calcs below)	tonne.km	0.032	kgCO2e/t.km	(calcs below)	DEFRA 2015 (t.km CF)	Medium (secondary)
		T4: Rigid >17t: 50% laden	(calcs below)	tonne.km	0.281	kgCO2e/t.km	(calcs below)	DEFRA 2015 (t.km CF)	Medium (secondary)
		T5: Rigid 7.5-17t: 100% utilization	(calcs below)	tonne.km	0.184	kgCO2e/t.km	(calcs below)	DEFRA 2015 (t.km CF)	Medium (secondary)
		T6: Rigid 7.5-17t: 75% utilization	(calcs below)	tonne.km	0.256	kgCO2e/t.km	(calcs below)	DEFRA 2015 (t.km CF)	Medium (secondary)
		T7: Rigid >17t: 75% laden	(calcs below)	tonne.km	0.223	kgCO2e/t.km	(calcs below)	DEFRA 2015 (t.km CF)	Medium (secondary)
		Additional transport accessories and data
		RSC Pallet LCA (trip to Warehouse; then to LLUH)	113	trip	3.5	kgCO2e/trip	395.5	Daniels (No.); GHG Guide (CF)	Medium (secondary)
		DSC Pallet LCA (one trip: mfger to LLUH)	358	trip	3.5	kgCO2e/trip	1253	Daniels (No.); GHG Guide (CF)	Medium (secondary)
		LCA for DSC carton manufacture	5723	carton	1.68	kgCO2e/kg	9614.64	GaBi (CF)	Medium (secondary)
		LCA for RSC transporter trips LLUH to factory (excl freight-wgt)	261	trips	0.23	kgCO2e/trip	60.03	Daniels (No.); GaBi (CF)	Medium (secondary)
		LCA for RSC transporters remaining onsite at LLUH	5	transporters	36	kgCO2e/trnsp	180	Daniels (No.); GaBi (CF)	Medium (secondary)
		Total Wgt RSC initial delivery (empty RSC; excl pallet wgt)	9.5492	tonne	(for calculations below)			Daniels (wgt.)	High (primary)
		Aver No. RSC per transporter	26.1	number	(for calculations below)			Daniels (No.)	High (primary)
		Wgt RSC transporter (tare)	0.18	tonne	(for calculations below)			Daniels (wgt)	High (primary)
		Wgt RSC Transporter (incl full RSC)	0.4488	tonne	(for calculations below)			Daniels (wgt)	High (primary)
		Wgt RSC Transporter (incl empty RSC)	0.3048	tonne	(for calculations below)			Daniels (wgt)	High (primary)
		Wgt full RSC + transporters for year LLUH-Fresno (excl contents)	344.8	tonne	(for calculations below)			Daniels (wgt)	High (primary)
		Wgt 412 DSC used in RSC study year	0.43	tonne	(for calculations below)			LLUH + Daniels (wgt)	High (primary)
		Wgt DSC Cardboard boxes for initial delivery to LLUH	8.2	tonne	(for calculations below)			Medline + Uline (wgt)	Medium (secondary)
		Number Non-PG2 DSC tranported in bulk bins to treatment facility	28191	DSC	(for calculations below)			Daniels (No.)	Medium
		Average size of Non-PG2 DSC transported to treatment facility	12.3	L	(for calculations below)			LLUH + Cardinal (vol)	High (primary)
		Usable fill-line capacity (90%) of 770L bulk-bin	693	L	(for calculations below)			Industry (capacity %)	Medium (estimate)
		Number Non-PG2 DSC per bulk-bin (allowing 10% air-space)	50.6	DSC	(for calculations below)			Daniels (wgt)	Medium (secondary)
		Freight-Wgt of 557 bulk bins required to transport Non-PG2 DSC	22.8	tonnes	(for calculations below)			Daniels (wgt)	Medium (secondary)
		Total freight-weight of all DSC (PG2 + Non-PG2) + Bulk bins	73.5	tonnes	(for calculations below)			Daniels (wgt)	Medium (secondary)
		Freight-weight of Chemo+Pharma DSC for incineration (excl contents)	18.82	tonnes	(for calculations below)			Daniels + LLUH (wgt)	High (primary)
		Freight-weight of bio-DSC for autoclaving (excl contents)	31.815	tonnes	(for calculations below)			Daniels + LLUH (wgt)	High (primary)
		Incinerator ash wgt as % of original waste wgt	15	%	(for calculations below)			USEPA WARM (%)	Medium (secondary)
		Transport GHG
		RSC
		ABS Polymer: Daejon to Inchon Korea: T1	170	km	(km.t.rate)	kgCO2e	168.83	Google Maps (distance)	Medium to High
		ABS Polymer: Korea to Vancouver (ship): T2	9151	km	(km.t.rate)	kgCO2e	1660.31	Port World (distance)	Medium to High
		ABS Polymer: Vancouver to Greenville MI (Rail): T3	3698	km	(km.t.rate)	kgCO2e	1130.01	Google Maps (distance)	Medium to High
		RSC to warehouse 1: Kenosha MI: T4	227	km	(km.t.rate)	kgCO2e	609.115	Google Maps (distance)	Medium to High
		RSC to CA Warehouse Fresno CA: T4	3271	km	(km.t.rate)	kgCO2e	8777.16	Google Maps (distance)	Medium to High
		Full RSC - LLUH to Daniels factory in Fresno: T5	442	km	(km.t.rate)	kgCO2e	28041.9	Google Maps (distance)	Medium to High
		Clean RSC from Fresno to LLUH: T6	442	km	(km.t.rate)	kgCO2e	39014.8	Google Maps (distance)	Medium to High
		Full DSC: Fresno to Incinerator in MD (RSC year; contents excl): T7	4460	km	(km.t.rate)	kgCO2e	427.669	Google Maps (distance)	Medium to High
		DSC Incinerator ash to landfill (RSC year): T1	50	km	(km.t.rate)	kgCO2e	0.3354	Google Maps (distance)	Medium to High
		DSC
		DSC Polymer: Whitmore Lake IL to Crystal lake IL: T1	477	km	(km.t.rate)	kgCO2e	2511.9	Google Maps (distance)	Medium to High
		DSC to Warehouse 1: Vernon CA: T4	3220	km	(km.t.rate)	kgCO2e	53235.1	Google Maps (distance)	Medium to High
		DSC Vernon to LLUH: San Bernardino CA: T4	131	km	(km.t.rate)	kgCO2e	1973.09	Google Maps (distance)	Medium to High
		Full DSC from LLUH to autoclave in Vernon CA: T5	131	km	(km.t.rate)	kgCO2e	1771.64	Google Maps (distance)	Medium to High
		Full DSC from Vernon to incinerator Salt Lake city UT: T7	1009	km	(km.t.rate)	kgCO2e	4234.63	Google Maps (distance)	Medium to High
		Transport of treated DSC from Vernon autoclave to landifll: T1	50	km	(km.t.rate)	kgCO2e	165.438	Google Maps (distance)	Medium to High
		Transport of DSC ash from Incinerator to landifll: T2	50	km	(km.t.rate)	kgCO2e	14.6796	Google Maps (distance)	Medium to High
		RSC Decanting and decontamination machine
		Energy required (allowing for 10% rewash)	36691.6	container	0.1202	kgCO2e/ctnr	4410.33	USEPA eGrid (Energy CF)	Medium (secondary)
		Energy GHG for Water Use +Wastewater Treatment	36692	container	0.1989	kgCO2e/ctnr	7298.04	DEFRA 2015 (water CF)	Medium (secondary)
		Total GHG - LCA's for Detergent+disinfectant+Smartguard	36692	container	0.0121	kgCO2e/ctnr	443.973	Daniels (No.); GaBi (CF)	Medium (secondary)
		Treatment
		GHG from incineration of Chemo+Pharma DSC	18.82	tonne	1443	kgCO2e/tonne	27157.3	Daniels (wgt); USEPA WARM (incin CF)	Medium (secondary)
		GHG from energy to autoclave bio DSC	31.815	tonne	125.2	kgCO2e/tonne	3983.24	Daniels (Wgt, Energy); USEPA eGrid (Energy CF)	Medium (secondary)
		References (sources and url's avail on request from TG)
		ACC	American Chemistry Council. (2010) Cradle-to-gate life cycle inventory of nine plastics resins and four polyurethane precursors. Prepared by Franklin Associates for the Plastic Division of the Americal Chemistry Council (2010):
		Cardinal	Sharps container (Covidien) Products 2015. Cardinal Health. USA
		Clarion	Clarion Technologies, Inc. Greenville, MI 48838.
		Daniels	Daniels Health United States. 111 W Jackson Boulevard, Suite 1900, Chicago IL 60604
		DEFRA 2015	Department for Environment, Food & Rural Affairs - GOV.UK. GHG Conversion Factors for company Reporting.
		GaBi	GaBi. Proprietary database of PE International, Boston MA USA (Thinkstep).
		GHG Guide	Guidance on measuring and reporting GHG emissions from freight transport operations, 2010. DEFRA and Industry Consortium.
		Google Maps	Google Maps USA.
		LLUH	Loma Linda University health System, San Bernardino CA, USA.
		Medline	Sharps Container weights and carton specifications.
		Port World	Port World Distance calculator.
		Uline	Uline Corrugated Products, 12575 Uline Drive, Pleasant Prairie, WI 53158.
		USEPA eGRID	U.S. Environmental Protection Agency. Emissions & Generation Resource Integrated Database (eGRID).
		USEPA Warm	U.S. Environmental Protection Agency. Documentation for Greenhouse Gas Emission and Energy Factors Used in the Waste Reduction Model (WARM)
